# Supplementary material
Source: PubMed Central journal article supplement (PMC8592151)
Supplement: tpmd210256.SD1.pdf [file tpmd210256.SD1.pdf]

**Supplemental Figure S1:** Study flow of index cases, households and household members analyzed.

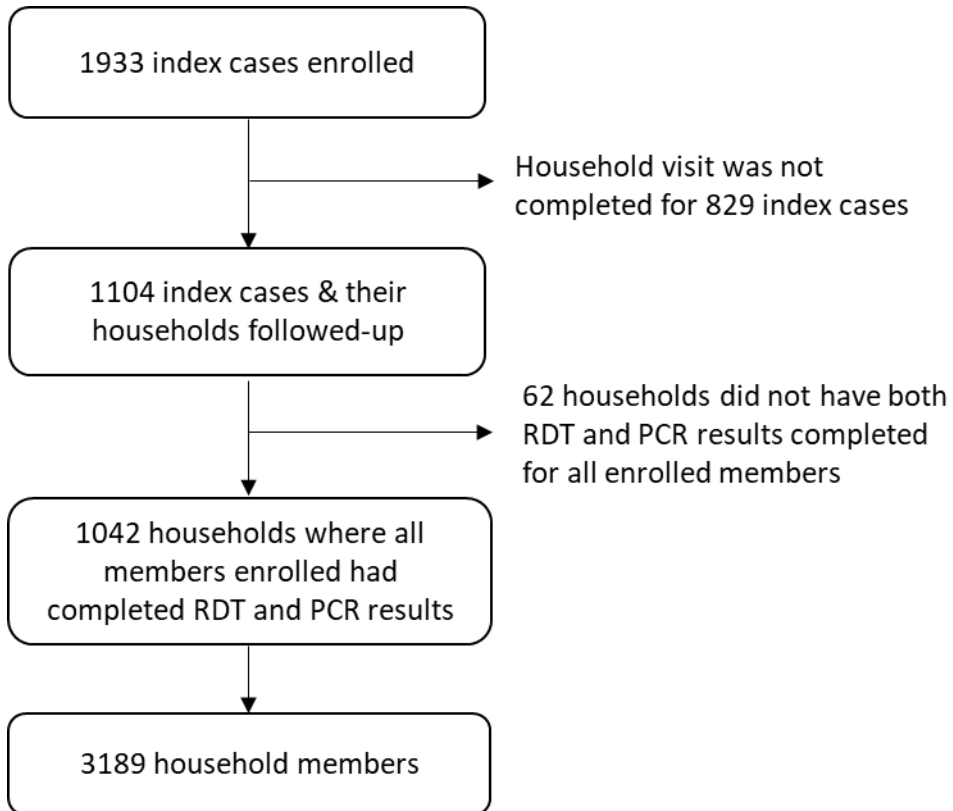

**Supplemental Table S1:** Individual-level regression analysis with household and facility random effects (Odds Ratios (95% confidence interval))

| Variable                 | Any Positive Test    |                    | RDT +                  |                        | PCR+              |                   |
|--------------------------|----------------------|--------------------|------------------------|------------------------|-------------------|-------------------|
|                          | OR (95% CI)          | aOR (95% CI)       | OR (95% CI)            | aOR (95% CI)           | OR (95% CI)       | aOR (95% CI)      |
| <b>Age</b>               |                      |                    |                        |                        |                   |                   |
| ≤15y                     | -                    | -                  | -                      | -                      | -                 | -                 |
| 16-40y                   | 0.82 (0.68-0.98)*    | 0.91 (0.75-1.1)    | 0.37 (0.27-0.50)*      | 0.43 (0.3-0.63)*       | 0.91 (0.76-1.10)  | 0.97 (0.8-1.17)   |
| 40y+                     | 0.78 (0.58-1.05)     | 0.84 (0.62-1.14)   | 0.28 (0.17-0.48)*      | 0.24 (0.13-0.48)*      | 0.86 (0.64-1.15)  | 0.89 (0.66-1.21)  |
| <b>Male gender</b>       | 1.04 (0.88-1.23)     | 1.03 (0.86-1.23)   | 1.45 (1.15-1.84)*      | 1.26 (0.91-1.76)       | 0.98 (0.83-1.15)  | 0.98 (0.83-1.17)  |
| <b>Sleeping location</b> |                      |                    |                        |                        |                   |                   |
| Outdoors (ref.)          | -                    | -                  | -                      | -                      | -                 | -                 |
| Indoors                  | 0.78 (0.61-0.99)*    | 0.73 (0.56-0.94)*  | 0.87 (0.62-1.22)       | 0.78 (0.5-1.22)        | 0.76 (0.60-0.97)  | 0.72 (0.56-0.93)* |
| <b>Net Use</b>           | 1.14 (0.89-1.45)     | 1.29 (0.99-1.68)   | 1.17 (0.84-1.62)       | 1.11 (0.7-1.75)        | 1.15 (0.90-1.47)  | 1.32 (1.02-1.71)* |
| <b>Any travel in HH</b>  | 0.62 (0.39-0.98)*    | 0.64 (0.4-1.02)    | 0.45 (0.22-0.93)*      | 0.56 (0.21-1.48)       | 0.67 (0.42-1.06)* | 0.7 (0.44-1.11)   |
| <b>Any symptoms</b>      | 13.17 (13.14-13.20)* | 15.99 (9.7-26.37)* | 184.49 (91.72-371.08)* | 183.18 (89.31-375.75)* | 3.98 (2.80-5.65)* | 4.06 (2.82-5.86)* |
| <b>Water source</b>      |                      |                    |                        |                        |                   |                   |
| Closed water             | -                    | -                  | -                      | -                      | -                 | -                 |
| Open water               | 1.33 (1.04-1.70)     | 1.12 (0.87-1.44)   | 1.80 (1.28-2.53)*      | 1.4 (0.88-2.22)        | 1.38 (1.09-1.75)* | 1.19 (0.93-1.52)  |
| <b>Any livestock</b>     | 1.30 (1.02-1.66)*    | 1.13 (0.88-1.44)   | 1.48 (1.02 - 2.13)*    | 0.95 (0.59-1.54)       | 1.26 (0.99-1.60)  | 1.11 (0.87-1.41)  |
| <b>Any latrine</b>       | 0.77 (0.58-1.03)     | 0.77 (0.57-1.02)   | 0.94 (0.62-1.44)       | 0.86 (0.5-1.47)        | 0.69 (0.52-0.91)* | 0.71 (0.53-0.94)* |

**Supplemental Table S2: Characteristics of all case patients enrolled from facilities (% (count/total))**

|                 | Facility case patients<br>(n = 1933) |
|-----------------|--------------------------------------|
| Female          | 51.8 (977/1885)                      |
| Traveled        | 5.4 (103/1923)                       |
| Age (years)     |                                      |
| ≤ 15            | 59.3 (1138/1919)                     |
| 16-40           | 33.6 (644/1919)                      |
| > 40            | 7.1 (137/1919)                       |
| Symptoms        |                                      |
| Any symptoms    | 98.9 (1912/1933)                     |
| Fever           | 81.7 (1580/1933)                     |
| Headache        | 79.6 (1539/1933)                     |
| Chills          | 15.7 (304/1933)                      |
| Body ache       | 33.3 (644/1933)                      |
| Runny nose      | 4.5 (87/1933)                        |
| Cough           | 28.2 (545/1933)                      |
| None            | 1.1 (21/1933)                        |
| Health facility |                                      |
| Kerio           | 21.0 (406/1933)                      |
| Nadoto          | 27.3 (527/1933)                      |
| Nakechichok     | 12.0 (231/1933)                      |
| Ngiitakito      | 14.9 (287/1933)                      |
| St. Monica      | 14.1 (272/1933)                      |
| St. Patricks    | 10.9 (210/1933)                      |

**Supplemental Table S2.** Breakdown of travel destinations or visitor origins by malaria endemicity for index patients and household members (from households that had complete PCR results). Some members reported multiple trips. All locations were within Kenya (except for a single international destination in Sudan). Endemicity of each county was assigned based on 2016 report from National Malaria Control Programme. (% (count/total))

| Destination/Origin endemicity | Index patient      |                   | Household member |               |                |
|-------------------------------|--------------------|-------------------|------------------|---------------|----------------|
|                               | Traveler<br>n = 47 | Visitor<br>n = 24 | All<br>n = 59    | RDT+<br>n = 7 | PCR+<br>n = 14 |
| Within Turkana                | 63.8 (30/47)       | 62.5 (15/24)      | 69.5 (41/59)     | 71.4 (5/7)    | 71.4 (10/14)   |
| To other counties             |                    |                   |                  |               |                |
| Endemic                       | 25.5 (12/47)       | 16.7 (4/24)       | 13.6 (8/59)      | 28.6 (2/7)    | 14.3 (2/14)    |
| Epidemic                      | 17.0 (8/47)        | 8.3 (2/24)        | 15.3 (9/59)      | 0 (0/7)       | 7.1 (1/14)     |
| Low risk                      | 2.1 (1/47)         | 12.5 (3/24)       | 6.8 (4/59)       | 0 (0/7)       | 7.1 (1/14)     |
| Seasonal risk                 | 2.1 (1/47)         | 4.2 (1/24)        | 0                | 0             | 0              |
| International                 | 0 (0)              | 0 (0)             | 1.7 (1/59)       | 0 (0/7)       | 0 (0/14)       |

**Supplemental Table S4.** Household-level regression analysis. Risk factors were analyzed for households in which all cases were detectable by RDT or all cases were detectable by PCR alone. Odds ratios for univariable and multivariable models are shown with 95% confidence intervals shown in parentheses. Significance levels at or below 0.05 is indicated with a \*.

| Variable                               | All cases in household detected by RDT |                       | All cases in household detected by PCR alone |                   |
|----------------------------------------|----------------------------------------|-----------------------|----------------------------------------------|-------------------|
|                                        | OR (95% CI)                            | aOR (95% CI)          | OR (95% CI)                                  | aOR (95% CI)      |
| Season enrolled (rainy)                | 1.49 (1.29-1.72)*                      | 1.19 (0.96-1.47)      | 1.09 (1.01-1.19)*                            | 0.98 (0.89-1.09)  |
| Index patient's gender (male)          | 0.84 (0.54-1.31)                       | 0.56 (0.28-1.12)      | 1.08 (0.81-1.44)                             | 1.1 (0.8-1.51)    |
| Index patient's age                    |                                        |                       |                                              |                   |
| ≤15 years (ref.)                       | -                                      | -                     | -                                            | -                 |
| 16-40 years                            | 0.47 (0.28-0.80)*                      | 0.47 (0.2-1.08)       | 1.06 (0.78-1.44)                             | 1.07 (0.76-1.49)  |
| ≥40 years                              | 0.37 (0.12- 1.11)                      | 0.36 (0.08-1.59)      | 1.04 (0.62-1.74)                             | 1.09 (0.62-1.92)  |
| HH members (n)                         | 1.31 (1.16-1.48)*                      | 0.99 (0.82-1.21)      | 1.24 (1.13-1.35)*                            | 1.15 (1.04-1.27)* |
| Children (n)                           |                                        |                       |                                              |                   |
| 0 (ref.)                               | -                                      | -                     | -                                            | -                 |
| 1-2                                    | 5.09 (2.50-10.36)*                     | 2.5 (1.01-6.19)*      | 1.42 (1.00-2.01)*                            | 1.18 (0.81-1.72)  |
| 3+                                     | 30.39 (12.65-72.99)*                   | 9.95 (2.79-35.47)*    | 4.14 (2.49-6.88)*                            | 2.89 (1.59-5.24)* |
| Nets in HH                             |                                        |                       |                                              |                   |
| 0 (ref.)                               | -                                      | -                     | -                                            | -                 |
| 1-2 ppl/net                            | 0.26 (0.07-0.92)*                      | 0.25 (0.05-1.19)      | 0.81 (0.45-1.45)                             | 1.1 (0.57-2.1)    |
| 2-4 ppl/net                            | 3.24 (1.65-6.33)*                      | 4.71 (1.89-11.74)*    | 1.44 (0.83-2.51)                             | 1.48 (0.81-2.68)  |
| 4+ ppl/net                             | 5.36 (2.36-12.17)*                     | 5.88 (1.94-17.84)*    | 2.34 (1.25-4.38)*                            | 1.86 (0.9-3.85)   |
| Any outside sleeping                   | 1.24 (0.73-2.10)                       | 1.74 (0.79-3.84)      | 2.22 (1.51-3.27)*                            | 2.25 (1.43-3.52)* |
| Any symptoms in HH                     | 44.54 (19.63-101.09)*                  | 54.67 (17.96-166.46)* | 1.05 (0.41-2.67)                             | 1.12 (0.87-1.43)  |
| Any travel in HH                       | 0.89 (0.37-2.10)                       | 1.11 (0.62-2.01)      | 1.0 (0.56-1.77)                              | 1.1 (0.57-2.1)    |
| Water source                           |                                        |                       |                                              |                   |
| Closed water (ref.): well, piped, tank | -                                      | -                     | -                                            | -                 |
| Open water: river, stream, dam, hole   | 1.51 (0.91-2.51)                       | 1.23 (0.55-2.76)      | 0.90 (0.61-1.32)                             | 0.85 (0.56-1.29)  |
| Any livestock                          | 1.94 (1.13-3.34)*                      | 1.90 (0.83-4.33)      | 1.42 (1.01-1.99)*                            | 1.16 (0.79-1.7)   |
| Any latrine                            | 0.71 (0.38-1.33)                       | 0.66 (0.27-1.6)       | 0.69 (0.45-1.04)                             | 0.81 (0.5-1.31)   |
